# Supplementary material for: A Model of the Spatio-temporal Dynamics of Drosophila Eye Disc Development
Source: PLoS Comput Biol. 2016 Sep 14;12(9):e1005052. doi: 10.1371/journal.pcbi.1005052 (PMC5023109; doi:10.1371/journal.pcbi.1005052)
Supplement: S1 Table — The table summarizes all parameter values used in the model along with the evidence. All components i have the same production rate pi. (DOCX) [file pcbi.1005052.s002.docx]

| **Type** | **Parameter** | **Simulation Value** | **Reference Value** | **References** |
| --- | --- | --- | --- | --- |
| **Size** |  | 74 μm | Extrapolation from measured data |  |
|  | 172 μm | Extrapolation from measured data |  |
|  | 10000 μm2 | Extrapolation from measured data | [24] |
|  | 4 × 10-5 s-1 | Fitted growth kinetics | [24] |
|  | 0.0107 μm-1 | Fitted growth kinetics | [24] |
| **Diffusion** |  | 0.1 μm2 s-1 | Wing Disc value | [29] |
|  | 0.033 μm2 s-1 | Measured | Fig. 3 |
|  | 0.00025 μm2 s-1 | ~0, acts inside cell |  |
|  | 0.00025 μm2 s-1 | ~0, acts inside cell |  |
|  | 0.00025 μm2 s-1 | ~0, acts inside cell |  |
| **Degradation** |  | 2.5 × 10-4 s-1 | Half-life of Dpp in wing disc | [29] |
|  | 1 × 10-3 s-1 | Characteristic length in wing disc | [29,34] |
|  | 7 × 10-5 s-1 | Measured | Fig. 2 |
|  | 1 × 10-3 s-1 | Assuming fast kinetics |  |
|  | 1 × 10-3 s-1 | Assuming fast kinetics |  |
| **Prod & Regulation** |  | 7 × 10-5 s-1 | Non-Dimensional concentration |  |
|  | 3 × 10-10 μm-1 | Non-Dimensional concentration |  |
|  | 0.0015 | Fitted concentration profile | Fig. 7 |
|  | 0.01 | Fitted concentration profile | Fig. 7 |
|  | 0.003 | Fitted concentration profile | Fig. 7 |
|  | 0.008 | Fitted concentration profile | Fig. 7 |
|  | 0.02 | Fitted concentration profile | Fig. 7 |
|  | 1 | Fitted concentration profile | Fig. 7 |
|  | 1 | Fitted concentration profile | Fig. 7 |
|  | 2 | Fitted concentration profile | Fig. 7 |
|  | 0.0465 | Fitted concentration profile | Fig. 7 |
|  | 0.375 | Fitted concentration profile | Fig. 7 |
